# Supplementary material
Source: PubMed Central journal article supplement (PMC2646458)
Supplement: 90216.2008_1.pdf [file 90216.2008_1.pdf]

Supplemental Table 1. *Ceramide metabolism gene expression*

## SPT Women

|               | SPT Absolute Change |               |               |                |
|---------------|---------------------|---------------|---------------|----------------|
|               | PRE                 | POST          | POST+3D       | POST+2W        |
| control       | 1.767 ± 0.109       | 1.734 ± 0.156 |               |                |
| low/moderate  | 1.726 ± 0.142       | 1.708 ± 0.110 | 1.536 ± 0.067 | 2.226 ± 0.278* |
| low/vigorous  | 1.633 ± 0.147       | 1.712 ± 0.136 | 1.681 ± 0.141 | 1.747 ± 0.110  |
| high/vigorous | 1.402 ± 0.062       | 1.559 ± 0.088 | 1.495 ± 0.050 | 1.553 ± 0.081  |

\*  $P < 0.05$  vs POST + 3D

## SPT Men

|               | SPT Absolute Change |               |               |               |
|---------------|---------------------|---------------|---------------|---------------|
|               | PRE                 | POST          | POST+3D       | POST+2W       |
| control       | 1.791 ± 0.142       | 2.42 ± 0.277* |               |               |
| low/moderate  | 1.943 ± 0.214       | 1.889 ± 0.228 | 2.112 ± 0.288 | 2.102 ± 0.215 |
| low/vigorous  | 1.820 ± 0.126       | 1.817 ± 0.174 | 1.767 ± 0.190 | 2.002 ± 0.213 |
| high/vigorous | 2.448 ± 0.575       | 2.072 ± 0.298 | 2.427 ± 0.421 | 2.005 ± 0.326 |

\*  $P < 0.05$  vs PRE

## AC Women

|               | AC Absolute Change |               |               |                |
|---------------|--------------------|---------------|---------------|----------------|
|               | PRE                | POST          | POST+3D       | POST+2W        |
| control       | 1.804 ± 0.154      | 1.616 ± 0.119 |               |                |
| low/moderate  | 1.662 ± 0.102      | 1.661 ± 0.107 | 1.433 ± 0.051 | 1.981 ± 0.172* |
| low/vigorous  | 1.376 ± 0.065      | 1.651 ± 0.075 | 1.639 ± 0.178 | 1.623 ± 0.146  |
| high/vigorous | 1.455 ± 0.080      | 1.622 ± 0.127 | 1.610 ± 0.110 | 1.566 ± 0.108  |

\*  $P < 0.05$  vs POST + 3D

## AC Men

|               | AC Absolute Change |               |               |               |
|---------------|--------------------|---------------|---------------|---------------|
|               | PRE                | POST          | POST+3D       | POST+2W       |
| control       | 1.841 ± 0.204      | 2.144 ± 0.344 |               |               |
| low/moderate  | 1.722 ± 0.149      | 1.841 ± 0.197 | 1.937 ± 0.253 | 1.841 ± 0.166 |
| low/vigorous  | 1.88 ± 0.189       | 1.928 ± 0.266 | 1.796 ± 0.196 | 2.05 ± 0.213  |
| high/vigorous | 1.925 ± 0.320      | 2.028 ± 0.270 | 2.325 ± 0.376 | 2.02 ± 0.311  |

## SPT % change

| control        | low/moderate  | low/vigorous | high/vigorous |
|----------------|---------------|--------------|---------------|
| -0.493 ± 7.689 | 4.132 ± 10.33 | 7.04 ± 5.828 | 12.23 ± 6.705 |

SPT % change  
grouped exercisers

| control       | exercise    |
|---------------|-------------|
| -0.493 ± 7.68 | 7.8 ± 4.427 |

## SPT % change

| control       | low/moderate   | low/vigorous  | high/vigorous |
|---------------|----------------|---------------|---------------|
| 37.66 ± 16.54 | -2.648 ± 4.587 | 2.338 ± 11.38 | 0.086 ± 14.16 |

 $P = 0.12$ SPT % change  
grouped exercisers

| control       | exercise        |
|---------------|-----------------|
| 37.66 ± 16.54 | -0.067 ± 6.188* |

\*  $P < 0.05$  vs control

## AC % change

| control        | low/moderate  | low/vigorous  | high/vigorous |
|----------------|---------------|---------------|---------------|
| -7.353 ± 6.136 | 3.599 ± 9.682 | 22.38 ± 7.983 | 11.31 ± 5.255 |

 $P = 0.052$ AC % change  
grouped exercisers

| control        | exercise       |
|----------------|----------------|
| -7.353 ± 6.136 | 12.43 ± 4.604* |

\*  $P < 0.05$  vs control

## AC % change

| control       | low/moderate  | low/vigorous  | high/vigorous |
|---------------|---------------|---------------|---------------|
| 17.44 ± 13.08 | 7.388 ± 7.074 | 3.741 ± 10.64 | 12.05 ± 10.60 |

AC % change  
grouped exercisers

| control       | exercise      |
|---------------|---------------|
| 17.44 ± 13.08 | 7.898 ± 5.405 |

Supplemental Table 2. *Fatty acid metabolism gene expression*

## SCD-1 Women

|               | SCD-1 Absolute Change |               |               |               |
|---------------|-----------------------|---------------|---------------|---------------|
|               | PRE                   | POST          | POST+3D       | POST+2W       |
| control       | 3.075 ± 0.498         | 4.667 ± 2.295 |               |               |
| low/moderate  | 2.389 ± 0.494         | 2.332 ± 0.409 | 2.06 ± 0.579  | 2.357 ± 0.332 |
| low/vigorous  | 2.839 ± 0.7572        | 3.074 ± 1.052 | 3.034 ± 0.685 | 2.76 ± 0.914  |
| high/vigorous | 2.19 ± 0.336          | 2.355 ± 0.535 | 1.98 ± 0.340  | 2.414 ± 0.382 |

| SCD-1 % change |               |              |               |
|----------------|---------------|--------------|---------------|
| control        | low/moderate  | low/vigorous | high/vigorous |
| 46.09 ± 62.63  | 10.56 ± 17.91 | 8.54 ± 19.41 | 27.09 ± 30.74 |

| SCD-1 % change grouped exercisers |              |
|-----------------------------------|--------------|
| control                           | exercise     |
| 46.09 ± 62.63                     | 15.4 ± 13.13 |

## SCD-1 Men

|               | SCD-1 Absolute Change |               |               |               |
|---------------|-----------------------|---------------|---------------|---------------|
|               | PRE                   | POST          | POST+3D       | POST+2W       |
| control       | 2.258 ± 0.465         | 3.58 ± 1.246  |               |               |
| low/moderate  | 2.505 ± 0.545         | 2.142 ± 0.437 | 2.619 ± 0.460 | 2.573 ± 0.421 |
| low/vigorous  | 2.312 ± 0.434         | 2.554 ± 0.668 | 1.746 ± 0.229 | 2.763 ± 0.654 |
| high/vigorous | 2.941 ± 0.778         | 2.47 ± 0.514  | 3.072 ± 0.904 | 2.325 ± 0.437 |

| SCD-1 % change |                |               |               |
|----------------|----------------|---------------|---------------|
| control        | low/moderate   | low/vigorous  | high/vigorous |
| 66.94 ± 49.12  | -7.019 ± 10.46 | 10.31 ± 14.54 | 37.81 ± 43.41 |

| SCD-1 % change grouped exercisers |               |
|-----------------------------------|---------------|
| control                           | exercise      |
| 66.94 ± 49.12                     | 14.66 ± 16.45 |

## CPT-1β Women

|               | CPT-1β Absolute Change |               |               |               |
|---------------|------------------------|---------------|---------------|---------------|
|               | PRE                    | POST          | POST+3D       | POST+2W       |
| control       | 1.423 ± 0.129          | 1.388 ± 0.173 |               |               |
| low/moderate  | 1.396 ± 0.114          | 1.359 ± 0.121 | 1.234 ± 0.072 | 1.449 ± 0.136 |
| low/vigorous  | 1.26 ± 0.090           | 1.584 ± 0.198 | 1.359 ± 0.149 | 1.398 ± 0.108 |
| high/vigorous | 1.266 ± 0.086          | 1.489 ± 0.161 | 1.316 ± 0.090 | 1.334 ± 0.099 |

| CPT-1β % change |               |               |               |
|-----------------|---------------|---------------|---------------|
| control         | low/moderate  | low/vigorous  | high/vigorous |
| -3.4 ± 4.351    | -1.08 ± 6.476 | 22.67 ± 7.872 | 18.15 ± 12.09 |
| <i>P</i> = 0.06 |               |               |               |

| CPT-1β % change grouped exercisers |                |
|------------------------------------|----------------|
| control                            | exercise       |
| -3.4 ± 4.351                       | 13.25 ± 5.434* |
| * <i>P</i> < 0.05 vs control       |                |

## CPT-1β Men

|               | CPT-1β Absolute Change |               |               |               |
|---------------|------------------------|---------------|---------------|---------------|
|               | PRE                    | POST          | POST+3D       | POST+2W       |
| control       | 1.416 ± 0.112          | 1.63 ± 0.175  |               |               |
| low/moderate  | 1.488 ± 0.131          | 1.416 ± 0.170 | 1.47 ± 0.155  | 1.427 ± 0.195 |
| low/vigorous  | 1.495 ± 0.105          | 1.653 ± 0.332 | 1.365 ± 0.862 | 1.804 ± 0.218 |
| high/vigorous | 1.445 ± 0.114          | 1.855 ± 0.369 | 1.659 ± 0.193 | 1.43 ± 0.108  |

| CPT-1β % change |                |               |               |
|-----------------|----------------|---------------|---------------|
| control         | low/moderate   | low/vigorous  | high/vigorous |
| 14.14 ± 8.563   | -2.877 ± 9.255 | 9.742 ± 17.98 | 29.73 ± 22.77 |

| CPT-1β % change grouped exercisers |              |
|------------------------------------|--------------|
| control                            | exercise     |
| 14.14 ± 8.563                      | 12.9 ± 10.40 |

Supplemental Table 3. Triglyceride metabolism gene expression

DGAT-1 Women

|               | DGAT-1 Absolute Change |                 |               |               |
|---------------|------------------------|-----------------|---------------|---------------|
|               | PRE                    | POST            | POST+3D       | POST+2W       |
| control       | 1.605 ± 0.159          | 1.358 ± 0.065 * |               |               |
| low/moderate  | 1.465 ± 0.104          | 1.405 ± 0.076   | 1.358 ± 0.057 | 1.508 ± 0.113 |
| low/vigorous  | 1.443 ± 0.131          | 1.55 ± 0.164    | 1.442 ± 0.139 | 1.38 ± 0.086  |
| high/vigorous | 1.424 ± 0.116          | 1.539 ± 0.125   | 1.462 ± 0.092 | 1.316 ± 0.065 |

\*  $P < 0.05$  vs PRE

| DGAT-1 % change |                |                |                |
|-----------------|----------------|----------------|----------------|
| control         | low/moderate   | low/vigorous   | high/vigorous  |
| -11.78 ± 4.403  | -2.498 ± 4.666 | 6.582 ± 2.790* | 9.268 ± 6.518* |

\*  $P < 0.05$  vs control

| DGAT -1 % change grouped exercisers |               |
|-------------------------------------|---------------|
| control                             | exercise      |
| -11.78 ± 4.403                      | 4.45 ± 2.886* |

\*  $P < 0.05$  vs control

DGAT-1 Men

|               | DGAT-1 Absolute Change |                |               |               |
|---------------|------------------------|----------------|---------------|---------------|
|               | PRE                    | POST           | POST+3D       | POST+2W       |
| control       | 1.696 ± 0.137          | 2.179 ± 0.308# |               |               |
| low/moderate  | 1.695 ± 0.132          | 1.689 ± 0.118  | 1.772 ± 0.171 | 1.539 ± 0.141 |
| low/vigorous  | 1.811 ± 0.167          | 1.838 ± 0.252  | 1.718 ± 0.183 | 1.608 ± 0.098 |
| high/vigorous | 1.774 ± 0.298          | 1.848 ± 0.207  | 1.861 ± 0.216 | 1.505 ± 0.119 |

#  $P = 0.09$  vs PRE

| DGAT-1 % change |               |               |               |
|-----------------|---------------|---------------|---------------|
| control         | low/moderate  | low/vigorous  | high/vigorous |
| 27.66 ± 14.5    | 1.124 ± 5.774 | 1.134 ± 7.919 | 12.79 ± 10.80 |

| DGAT -1 % change grouped exercisers |                 |
|-------------------------------------|-----------------|
| control                             | exercise        |
| 27.66 ± 14.5                        | 5.328 ± 4.925 # |

#  $P = 0.06$  vs control

HSL Women

|               | HSL Absolute Change |               |               |               |
|---------------|---------------------|---------------|---------------|---------------|
|               | PRE                 | POST          | POST+3D       | POST+2W       |
| control       | 1.596 ± 0.092       | 1.557 ± 0.076 |               |               |
| low/moderate  | 1.739 ± 0.187       | 1.591 ± 0.105 | 1.594 ± 0.093 | 1.462 ± 0.056 |
| low/vigorous  | 1.795 ± 0.158       | 1.72 ± 0.147  | 1.631 ± 0.230 | 1.586 ± 0.245 |
| high/vigorous | 1.555 ± 0.106       | 1.789 ± 0.174 | 1.539 ± 0.089 | 1.519 ± 0.151 |

| HSL % change  |                |                |               |
|---------------|----------------|----------------|---------------|
| control       | low/moderate   | low/vigorous   | high/vigorous |
| 1.259 ± 8.368 | -4.668 ± 6.076 | -1.973 ± 7.546 | 16.43 ± 10.55 |

| HSL % change grouped exercisers |               |
|---------------------------------|---------------|
| control                         | exercise      |
| 1.259 ± 8.368                   | 3.262 ± 4.925 |

HSL Men

|               | HSL Absolute Change |                |               |               |
|---------------|---------------------|----------------|---------------|---------------|
|               | PRE                 | POST           | POST+3D       | POST+2W       |
| control       | 1.956 ± 0.160       | 2.164 ± 0.195# |               |               |
| low/moderate  | 1.852 ± 0.228       | 1.861 ± 0.277  | 2.207 ± 0.423 | 1.762 ± 0.281 |
| low/vigorous  | 2.106 ± 0.287       | 1.903 ± 0.155  | 2.07 ± 0.263  | 1.797 ± 0.183 |
| high/vigorous | 1.909 ± 0.219       | 2.119 ± 0.294  | 2.408 ± 0.406 | 2.392 ± 0.801 |

#  $P = 0.08$  vs PRE

| HSL % change  |                |                |               |
|---------------|----------------|----------------|---------------|
| control       | low/moderate   | low/vigorous   | high/vigorous |
| 10.84 ± 5.187 | -0.098 ± 7.602 | -3.538 ± 8.103 | 10.49 ± 10.49 |

| HSL % change grouped exercisers |               |
|---------------------------------|---------------|
| control                         | exercise      |
| 10.84 ± 5.187                   | 2.286 ± 5.024 |

Supplemental Table 4. *Lipid metabolism transcription factor gene expression*

## SREBP-1c Women

|               | SREBP-1c Absolute Change |               |               |               |
|---------------|--------------------------|---------------|---------------|---------------|
|               | PRE                      | POST          | POST+3D       | POST+2W       |
| control       | 2.224 ± 0.293            | 2.052 ± 0.195 |               |               |
| low/moderate  | 1.828 ± 0.203            | 1.885 ± 0.197 | 1.773 ± 0.121 | 2.159 ± 0.358 |
| low/vigorous  | 1.998 ± 0.250            | 2.131 ± 0.268 | 1.927 ± 0.326 | 1.884 ± 0.225 |
| high/vigorous | 1.885 ± 0.179            | 2.101 ± 0.341 | 1.796 ± 0.109 | 2.179 ± 0.264 |

| SREBP-1c % change |               |               |               |
|-------------------|---------------|---------------|---------------|
| control           | low/moderate  | low/vigorous  | high/vigorous |
| -2.797 ± 6.29     | 6.528 ± 9.857 | 7.927 ± 9.382 | 15.84 ± 22.02 |

| SREBP -1c % change grouped exercisers |              |
|---------------------------------------|--------------|
| control                               | exercise     |
| -2.797 ± 6.29                         | 10.1 ± 8.359 |

## SREBP-1c Men

|               | SREBP-1c Absolute Change |               |               |               |
|---------------|--------------------------|---------------|---------------|---------------|
|               | PRE                      | POST          | POST+3D       | POST+2W       |
| control       | 2.028 ± 0.215            | 4.31 ± 1.580  |               |               |
| low/moderate  | 2.3 ± 0.226              | 2.459 ± 0.245 | 2.277 ± 0.269 | 2.484 ± 0.411 |
| low/vigorous  | 2.494 ± 0.362            | 2.506 ± 0.678 | 1.992 ± 0.192 | 2.279 ± 0.242 |
| high/vigorous | 2.018 ± 0.266            | 2.13 ± 0.257  | 1.949 ± 0.267 | 2.171 ± 0.304 |

| SREBP-1c % change |               |                |               |
|-------------------|---------------|----------------|---------------|
| control           | low/moderate  | low/vigorous   | high/vigorous |
| 127.9 ± 93.57     | 9.286 ± 10.33 | -7.337 ± 8.951 | 8.049 ± 7.22  |
| <i>P</i> = 0.13   |               |                |               |

| SREBP -1c % change grouped exercisers |                |
|---------------------------------------|----------------|
| control                               | exercise       |
| 127.9 ± 93.57                         | 3.332 ± 5.17 * |
| * <i>P</i> < 0.05 vs control          |                |

## PGC-1α Women

|               | PGC-1α Absolute Change |                 |               |               |
|---------------|------------------------|-----------------|---------------|---------------|
|               | PRE                    | POST            | POST+3D       | POST+2W       |
| control       | 2.002 ± 0.183          | 1.662 ± 0.127 * |               |               |
| low/moderate  | 1.981 ± 0.249          | 1.668 ± 0.131   | 1.573 ± 0.093 | 1.706 ± 0.196 |
| low/vigorous  | 1.555 ± 0.113          | 1.957 ± 0.332   | 1.958 ± 0.296 | 1.704 ± 0.216 |
| high/vigorous | 1.616 ± 0.168          | 1.942 ± 0.183 * | 1.661 ± 0.108 | 1.629 ± 0.155 |

| PGC-1α % change |                |               |               |
|-----------------|----------------|---------------|---------------|
| control         | low/moderate   | low/vigorous  | high/vigorous |
| -15.21 ± 3.968  | -4.391 ± 13.32 | 26.32 ± 17.69 | 24.46 ± 11.54 |
| <i>P</i> = 0.06 |                |               |               |

| PGC-1α % change grouped exercisers |                 |
|------------------------------------|-----------------|
| control                            | exercise        |
| -15.21 ± 3.968                     | 14.39 ± 8.571 * |
| * <i>P</i> < 0.05 vs control       |                 |

\* *P* < 0.05 vs PRE

## PGC-1α Men

|               | PGC-1α Absolute Change |               |               |               |
|---------------|------------------------|---------------|---------------|---------------|
|               | PRE                    | POST          | POST+3D       | POST+2W       |
| control       | 1.778 ± 0.284          | 2.673 ± 0.467 |               |               |
| low/moderate  | 1.806 ± 0.300          | 2.009 ± 0.378 | 2.03 ± 0.319  | 1.82 ± 0.281  |
| low/vigorous  | 1.97 ± 0.435           | 1.833 ± 0.275 | 2.391 ± 0.531 | 2.069 ± 0.352 |
| high/vigorous | 1.62 ± 0.246           | 2.273 ± 0.378 | 2.386 ± 0.429 | 2.346 ± 0.869 |

| PGC-1α % change |               |               |               |
|-----------------|---------------|---------------|---------------|
| control         | low/moderate  | low/vigorous  | high/vigorous |
| 74.04 ± 42.65   | 10.55 ± 6.825 | 4.045 ± 13.86 | 47.97 ± 22.11 |

| PGC-1α % change grouped exercisers |                |
|------------------------------------|----------------|
| control                            | exercise       |
| 74.04 ± 42.65                      | 20.39 ± 9.208# |
| # <i>P</i> = 0.06 vs control       |                |

Supplemental Table 5. *Lipoprotein lipase gene expression*

LPL Women

|               | LPL Absolute Change |               |               |                |
|---------------|---------------------|---------------|---------------|----------------|
|               | PRE                 | POST          | POST+3D       | POST+2W        |
| control       | 4.046 ± 0.903       | 3.351 ± 0.631 |               |                |
| low/moderate  | 3.227 ± 0.603       | 3.764 ± 0.620 | 3.115 ± 0.446 | 4.032 ± 0.785  |
| low/vigorous  | 2.779 ± 0.307       | 4.087 ± 0.733 | 3.296 ± 0.411 | 3.394 ± 0.495  |
| high/vigorous | 2.789 ± 0.431       | 3.765 ± 0.615 | 2.966 ± 0.441 | 2.314 ± 0.333* |

\*  $P < 0.05$  vs POST

LPL Men

|               | LPL Absolute Change |               |               |               |
|---------------|---------------------|---------------|---------------|---------------|
|               | PRE                 | POST          | POST+3D       | POST+2W       |
| control       | 1.531 ± 0.218       | 1.898 ± 0.321 |               |               |
| low/moderate  | 1.243 ± 0.055       | 1.485 ± 0.108 | 1.383 ± 0.090 | 1.42 ± 0.151  |
| low/vigorous  | 1.345 ± 0.083       | 1.32 ± 0.066  | 1.446 ± 0.132 | 1.484 ± 0.066 |
| high/vigorous | 1.772 ± 0.363       | 1.862 ± 0.284 | 2.027 ± 0.469 | 1.572 ± 0.233 |

LPL % change

| control       | low/moderate  | low/vigorous  | high/vigorous |
|---------------|---------------|---------------|---------------|
| -6.11 ± 13.74 | 28.40 ± 19.74 | 42.08 ± 14.24 | 42.06 ± 20.07 |

LPL % change  
grouped exercisers

| control       | exercise       |
|---------------|----------------|
| -6.11 ± 13.74 | 37.51 ± 10.22* |

\*  $P < 0.05$  vs control

LPL % change

| control      | low/moderate  | low/vigorous    | high/vigorous |
|--------------|---------------|-----------------|---------------|
| 28.86 ± 21.3 | 19.91 ± 8.131 | -0.4932 ± 5.011 | 12.85 ± 11.97 |

LPL % change  
grouped exercisers

| control      | exercise      |
|--------------|---------------|
| 28.86 ± 21.3 | 10.84 ± 5.346 |
